# Supplementary material
Source: Research Square preprint supplement (doi:10.21203/rs.3.rs-8632973/v1)
Supplement: Supplementary file 1 [file 1a6fa96103cc45c29d958fea.docx]

# **Supplementary File 1: Study Tool**

**Sociodemographic Characteristics**

**Instruction:**

**Please circle the appropriate response and fill up in blank spaces. Note: Read carefully before answering.**

| S.N | Question | Response | Code |
| --- | --- | --- | --- |
| 1. | Sex | 1. Male 2. Female 3. Others |  |
| 2. | Age | ______________ |  |
| 3. | Type of school | 1. Public 2. Private |  |
| 4. | Which stream do you study? | 1. Science 2. Management 3. Humanities 4. Others 5. If others then specify_____________ |  |
| 5 | In which class do you study? | 1. 11 2. 12 |  |
| 6 | Result in last examination?  (This may include term exam or final exam result) | 1. Failed 2. Passed 3. if passed then mention your GPA or Percentage of marks secured 4. ______________________________ |  |
| 7 | Family type | 1. Nuclear (parents, son /daughter) 2. Joint (parents, grandparents, 3. son/daughter 4. Extended (parents, grandparents, son/daughter, uncles/aunts/cousins) |  |
| 8 | Father's education | 1. No education 2. Basic education   Lower basic (1-5)  Upper basic (6-8)   1. Secondary education   Lower secondary (9-10)  Upper secondary (11-12)   1. More than secondary |  |
| 9 | Mother's education | 1. No education 2. Basic education   Lower basic (1-5)  Upper basic (6-8)   1. Secondary education   Lower secondary (9-10)  Upper secondary (11-12)   1. More than secondary |  |
| 10 | Who are you staying?  with currently? | 1. Staying with parents 2. Staying with relatives 3. Staying in hostel 4. Staying with friends 5. Staying with husband/wife 6. Others |  |
| **Socioeconomic status of household** | | | |
| 11 | How much is your monthly family income?? (all income source included) | 1. ≥ 97451 2. 48751-97450 3. 36551-48750 4. 24351-36550 5. 14551-24350 6. 4851- 14550 7. ≤ 4850 |  |
| 12 | What is the occupation of the head of your household? | 1. Professionals (e.g., Doctors, Engineers, Lawyers, Chartered Accountants) 2. Semi-professionals (e.g., Teachers, Nurses, Pharmacists, Technicians) 3. Clerical, shop-owner, farmer (e.g., Clerk, Shopkeeper, Small-scale Farmer) 4. Skilled worker (e.g., Electrician, Carpenter, Tailor) 5. Semi-skilled worker (e.g., Factory worker, Driver) 6. Unskilled worker (e.g., Laborer, Cleaner) 7. Unemployed |  |
| 13 | What is the highest level of education completed by the head of the family? | 1. Illiterate 2. Primary school certificate (class 5 completed) 3. Middle school certificate (Class 8 completed) 4. High school certificate (class 10 completed) 5. Intermediate or diploma (class 12 completed) 6. Graduate (Bachelor completed) 7. Professional or honors degree (Post graduation completed, Including B.E, MBBS |  |

**Socialization**

| S.N | Question | Response | Coding |
| --- | --- | --- | --- |
| 1 | How many close friends do you have? | 1. Five or more friends 2. Fewer than five friends | 1  2 |
| 2 | What is the amount of time you spent socializing per day? | 1. Two or more hours per day 2. Less than two hours per day | 1  2 |

**Corporal Punishment**

1. In the past year, have you ever been hit or slapped by a teacher or school staff when you disobeyed a rule?

- Yes
- No

**Bullying**

**(Bullying occurs when one or more students or other people about your age say or do hurtful or mean things. Bullying can occur when someone teases, threatens, ignores, spreads rumors about, calls someone a bad name, makes sexual remarks, or hits, shoves, or hurts another person repeatedly. It is not bullying when two people of about the same strength or power argue or fight or tease each other in a friendly way.)**

16. During the past 12 months, were you bullied on school property?

A. Yes

B. No 7.

17. During the past 12 months, were you bullied when you were not on school property?

A. Yes

B. No

**Cyber bullying is a form of bullying using social media and other forms of online communication. Cyber bullying may happen on Instagram, Twitter, Snapchat, and Facebook, and other social media platforms or through texting and email.**

18. During the past 12 months, where you cyber bullied?

A. Yes

B. No

**Academic stress**

**SCALE FOR ASSESSING ACADEMIC STRESS (SAAS)**

Here are some statements. Please go through each statement carefully and respond to the statements by encircling either ‘‘Yes’’ or ‘‘No’’ whichever is applicable to correctly explain your experiences after starting this course.

| 1. | It is very difficult for me to concentrate on my studies. | Yes | No |
| --- | --- | --- | --- |
| 2. | I get headache while studying. | Yes | No |
| 3. | I forget studied material very easily. | Yes | No |
| 4. | I feel myself inferior than my classmates | Yes | No |
| 5. | I lack interest in studies these day | Yes | No |
| 6. | I get nervous when my teacher asks questions in class | Yes | No |
| 7. | I lack confidence in academic activities. | Yes | No |
| 8. | I don’t enjoy extracurricular activities now days | Yes | No |
| 9. | I have difficulties in completing my lessons | Yes | No |
| 10. | I always feel under pressure for study | Yes | No |
| 11. | I get easily bored from studies | Yes | No |
| 12. | I feel no body is there to help me in studies | Yes | No |
| 13. | I always think of failure in the examination | Yes | No |
| 14. | I always worry about my parent’s expectations | Yes | No |
| 15. | I get easily irritated with everybody | Yes | No |
| 16. | I feel less desire to eat | Yes | No |
| 17. | Most of the times I don’t feel like talking to anybody | Yes | No |
| 18. | I like to stay alone most of the time | Yes | No |
| 19. | I strongly feel to discontinue studies | Yes | No |
| 20. | I gradually lose my sleep as examination approaches | Yes | No |
| 21. | I don’t feel like going to Campus | Yes | No |
| 22. | I daydream a lot during study | Yes | No |
| 23. | I feel sleepy when I start studies | Yes | No |
| 24. | I have difficulty in solving problems. | Yes | No |
| 25. | I feel nobody understands my difficulties | Yes | No |
| 26. | My heart beats fast before answering the questions | Yes | No |
| 27. | Many times I don’t answer in the class, though I know it | Yes | No |
| 28. | I doubt whether I’ll be able to complete my studies | Yes | No |
| 29. | I hesitate to discuss my academic problem | Yes | No |
| 30. | I feel very sad for not concentrating on my studies. | Yes | No |

**Social Media, Online communication and the internet**

| S.N. | Questions | Response | Code |
| --- | --- | --- | --- |
| 1 | Do you have a mobile phone that you use on a regular basis? | 1. Yes 2. No | 1  2 |
| 2 | **Social media includes Instagram, Twitter, Snapchat, and Facebook (and COUNTRY SPECIFIC EXAMPLE) and other social media platforms. Online communication includes texting and email.**  Do your parents or guardians have rules about how you can use social media, online communication, or the internet? | 1. Yes 2. No | 1  2 |
| 3 | During the past 7 days, how many hours per day did you use your mobile phone to be on social media, for online communication, or to browse the internet? | 1. I did not have a mobile phone during the past 7 days 2. Less than one hour per day 3. 1 to 2 hours per day 4. 3 to 4 hours per day 5. 5 to 6 hours per day 6. 7 to 8 hours per day 7. More than 8 hours per day |  |
| 4 | **Screen time includes time spent in front of a television; using a computer or mobile phone for social media, online communication, or browsing the internet; watching television shows, videos, or movies; and playing computer games. Screen time does not include online learning or doing homework.**  On an average school day, how many hours per day of screen time do you have? | 1. Less than 1 hour per day 2. 1 to 2 hours per day 3. 3 to 4 hours per day 4. 5 to 6 hours per day 5. 7 to 8 hours per day 6. More than 8 hours per day |  |

**DAAS- 21**

| Please read each statement and circle a number 0, 1, 2 or 3 that indicates how much the statement applied to you over the past week. There are no right or wrong answers. Do not spend too much time on any statement.  The rating scale is as follows:  0 Did not apply to me at all  1 Applied to me to some degree, or some of the time  2 Applied to me to a considerable degree, or a good part of time  3 Applied to me very much, or most of the time | | | | | |
| --- | --- | --- | --- | --- | --- |
| 1. | I found it hard to wind down | 0 | 1 | 2 | 3 |
| 2. | I was aware of dryness of my mouth | 0 | 1 | 2 | 3 |
| 3. | I couldn't seem to experience any positive feeling at all | 0 | 1 | 2 | 3 |
| 4. | I experienced breathing difficulty (eg, excessively rapid breathing, breathlessness in the absence of physical exertion) | 0 | 1 | 2 | 3 |
| 5. | I found it difficult to work up the initiative to do things | 0 | 1 | 2 | 3 |
| 6. | I tended to over-react to situations | 0 | 1 | 2 | 3 |
| 7. | I experienced trembling (eg, in the hands) | 0 | 1 | 2 | 3 |
| 8. | I felt that I was using a lot of nervous energy | 0 | 1 | 2 | 3 |
| 9. | I was worried about situations in which I might panic and make a fool of myself | 0 | 1 | 2 | 3 |
| 10. | I felt that I had nothing to look forward to | 0 | 1 | 2 | 3 |
| 11. | I found myself getting agitated | 0 | 1 | 2 | 3 |
| 12. | I found it difficult to relax | 0 | 1 | 2 | 3 |
| 13. | I felt down-hearted and blue | 0 | 1 | 2 | 3 |
| 14. | I was intolerant of anything that kept me from getting on with what I was doing | 0 | 1 | 2 | 3 |
| 15. | I felt I was close to panic | 0 | 1 | 2 | 3 |
| 16. | I was unable to become enthusiastic about anything | 0 | 1 | 2 | 3 |
| 17. | I felt I wasn't worth much as a person | 0 | 1 | 2 | 3 |
| 18. | I felt that I was rather touchy | 0 | 1 | 2 | 3 |
| 19. | I was aware of the action of my heart in the absence of physical exertion (eg, sense of heart rate increase, heart missing a beat) | 0 | 1 | 2 | 3 |
| 20. | I felt scared without any good reason | 0 | 1 | 2 | 3 |
| 21. | I felt that life was meaningless | 0 | 1 | 2 | 3 |

**Perceived parental academic pressure tool**

| **ITEMS** | Absolutely 1inappropriate (1) | Inappropriate (2) | Neither appropriate or inappropriate (3) | | Appropriate (4) | Absolutely appropriate (5) |
| --- | --- | --- | --- | --- | --- | --- |
| 1. My parents want me to study constantly. | ( ) | ( ) | ( ) | ( ) | | ( ) |
| 1. My parents restrict my activities other than studying. | ( ) | ( ) | ( ) | ( ) | | ( ) |
| 1. My parents force me to be successful at school. | ( ) | ( ) | ( ) | ( ) | | ( ) |
| 1. If I can’t get good grades, I am scared of my parents’ reaction. | ( ) | ( ) | ( ) | ( ) | | ( ) |
| 1. My parents think that I shouldn’t do anything other than studying | ( ) | ( ) | ( ) | ( ) | | ( ) |
| 1. My parents have very high expectations of me. | ( ) | ( ) | ( ) | ( ) | | ( ) |
| 1. If I fail the exams, my parents accuse me of not studying enough. | ( ) | ( ) | ( ) | ( ) | | ( ) |
| 1. My parents don’t want me to spare my time to anything other than my lessons. | ( ) | ( ) | ( ) | ( ) | | ( ) |
| 1. My parents have no tolerance for failure. | ( ) | ( ) | ( ) | ( ) | | ( ) |
| 1. Because of my parents’ pressure, I feel suffocated. | ( ) | ( ) | ( ) | ( ) | | ( ) |
| 1. My parents get angry with me when I take care of something except studying. | ( ) | ( ) | ( ) | ( ) | | ( ) |
| 1. My parents always want more from me in terms of school achievement. | ( ) | ( ) | ( ) | ( ) | | ( ) |
| 1. My parents put pressure on me to increase my pace of work. | ( ) | ( ) | ( ) | ( ) | | ( ) |
| 1. My parents don’t let me to meet with my friends having low school achievement. | ( ) | ( ) | ( ) | ( ) | | ( ) |
| 1. My parents always make me feel that I have to be successful in school. | ( ) | ( ) | ( ) | ( ) | | ( ) |
| 1. My parents compare my school success with others. | ( ) | ( ) | ( ) | ( ) | | ( ) |
| 1. My parents set up rules to prevent me from spending my time for non-academic activities | ( ) | ( ) | ( ) | ( ) | | ( ) |
| 1. My parents expect me to perform beyond my capacity. | ( ) | ( ) | ( ) | ( ) | | ( ) |
| 1. I get nervous when I talk to my parents about my exam results. | ( ) | ( ) | ( ) | ( ) | | ( ) |
| 1. What I want to do outside of studying is limited by my parents. | ( ) | ( ) | ( ) | ( ) | | ( ) |
