# Supplementary material
Source: Research Square preprint supplement (doi:10.21203/rs.3.rs-8632973/v1)
Supplement: Supplementary file 2 [file 3971fe9a70554e1fb072cc28.docx]

## Study Variables

### Independent variables

- Socio- demographic variables

1. Age
2. Sex
3. Family type
4. Living arrangement
5. Father’s education
6. Mother’s education
7. Economic class of family

- Academic variables

1. Study grade
2. Type of school
3. Study stream
4. Academic stress
5. Result in Last examination

- Socialization

1. Number of close friends
2. Time spent with friends

- Corporal punishment at school
- Bullying

1. Cyberbullying
2. Physical and emotional bullying.

- Social Media, Online communication, and the internet
- Perceived parental academic pressure

### Dependent variables

- Depression, Anxiety and Stress

## 1.6 Conceptual framework

**Socio- demographic variables**

1. Age
2. Sex
3. Family type
4. Living arrangement
5. Father’s education
6. Mother’s education
7. Economic class of family

**Perceived parental academic pressure**

**Socialization**

1. Number of close friends
2. Time spent with friends

**Corporal punishment at school**

**Bullying**

1. Cyberbullying
2. Physical and emotional bullying.

**Academic variables**

1. Study grade
2. Type of school
3. Study stream
4. Academic stress
5. Result in Last examination

**Social Media, Online communication, and the internet**

**Depression
Anxiety**

**Stress**

**Independent Variables**

**Independent Variables**

**Dependent Variable**

**Figure 1 : Conceptual framework**

## Operational definitions

**Age**

Current age of respondent in complete year.

**Sex**

Sex of respondents was categorized as Male, Female and others.

**Type of school**

It was categorized as government and private.

**Study grade**

It was categorized as grade 11 and 12.

**Faculty**

It was categorized as science and technology, management, humanities, and law.

**Result in last exam**

It referred to the academic result in the exam that the student had recently appeared for; it was categorized as passed and failed.

**Ethnicity**

The ethnicity status of respondents was categorized as Dalit, Janajati, Madhesi, Muslim, Brahmin/Chhetri, and others based on HMIS classification.

**Family Type:**

Families were categorized into three types: nuclear, joint, and extended.

**Father’s education:**

The education status of the respondent's father was categorized as No education, Lower basic (1-5), Upper basic (6-8), Lower secondary (9-10), Upper secondary (11-12), and More than secondary (12 above) based on the NDHS 2022 classification.

**Mother’s education:**

Education status of respondent’s mother was categorized as No education, Lower basic (1-5), Upper basic (6-8), Lower secondary (9-10), Upper secondary (11-12) and more than secondary (12 above) based on NDHS 2022 classification.

**Living arrangement:**

Living arrangement indicated the respondent's current living arrangement, which was categorized as living with parents, living with relatives, residing in a hostel, living with friends, living with husband/wife, or other.

**Socioeconomic status of household:**

The socioeconomic status of a household was determined by combining the monthly family income, the occupation of the head of the household, and the education level of the head of the household. Based on the established cut-off scores for Nepal, households were classified into three categories: upper, middle, and lower.

**Socialization status:**

Socializing was assessed by asking two questions which was based on a similar study done by Vankim and Nelson. The first question assessed the number of close friends categorized as five or more friends and fewer than five friends. Similarly, the second question assessed the time spent socializing, which was categorized into two or more hours per day, and less than two hours per day. Students who reported five or more friends and 2 or more socializing hours per day were coded as high socializing and all others were coded as low socializing.

**Corporal punishment at school**

Corporal or physical punishment was defined by the UN committee on the convention on the rights of the child as any form of punishment in which physical force is applied which is intended to cause some degree of pain or discomfort. Corporal punishment at school in the past year referred to actions such as hitting or slapping students by teachers or school staff for disciplinary purpose. Corporal punishment was categorized as Yes and No based on the experiences of respondents.

**Bullying on school property.**

Bullying is when one or more student tease, threaten, spread rumours about, hit, shove, or hurt another student over and over again. It is not bullying when two students of about same strength or power argue or fight or tease each other in a friendly way. Being bullied on school property referred to being bullied inside the premises of the school. It was categorized as Yes if someone had experienced such bullying, and No if they had not.

**Bullying outside school property**

Being bullied outside school property referred to bullying that occurred outside the school premises within the past 12 months. It was categorized as Yes if someone had experienced such bullying, and No if they had not.

**Cyberbullying**

It refers to being bullied through texting, Instagram, Facebook, or other social media in the past 12 months. It has been categorized as Yes if someone experienced such bullying, and no if they did not.

**Academic stress**

The Scale for Assessing Academic Stress (SAAS), developed by Sinha, Nepal, and Sharma in 2001, was used to measure academic stress levels of students in this study. The scale included 30 yes-or-no questions, with a score of 1 for each positive response. The maximum possible score was 30, while the minimum was 0. Scores of 15 and below were categorized as indicating no academic stress, while scores above 16 were categorized as indicating academic stress based on the mean score.

**Perceived parental academic pressure**

Perceived parental academic pressure tool is a 20-item tool. Each item is rated on 5-point Likert scale, ranging from 1(absolutely inappropriate) to 5 (absolutely appropriate). Based on the normality of the data, parental academic pressure was categorized as having pressure when the value on the parental academic pressure tool was above 60, and as having no pressure when the value was less than or equal to 60.

**Depression, anxiety, and stress**

Depression, Anxiety and Stress Scale-21 was used to assess Depression, anxiety, and stress. DASS-21 is a set of three self-report scales designed to measure the emotional states of depression, anxiety, and stress. each item is rated on a four-point scale ranging from 0-3 based on experience in the last week. Each of the three DASS-21 scales contains 7 items. The depression scale assesses dysphoria, hopelessness, devaluation of life, self-deprecation, lack of interest / involvement, anhedonia, and inertia. The anxiety scale assesses autonomic arousal, skeletal muscle effects, situational anxiety, and subjective experience of anxious affect. The stress scale assesses difficulty relaxing, nervous arousal, and being easily upset / agitated, irritable / over-reactive and impatient. Scores for depression, anxiety and stress are calculated by summing the scores for the relevant items. The cut off scores for depression, anxiety and stress are given below:

**Table 1 : Scoring and grading of DAS scale**

| Category | Depression | Anxiety | Stress |
| --- | --- | --- | --- |
| Normal | 0-9 | 0-7 | 0-14 |
| Mild | 10-13 | 8-9 | 15-18 |
| Moderate | 14-20 | 10-14 | 19-25 |
| Severe | 21-27 | 15-19 | 26-33 |
| Extremely Severe | 28+ | 20+ | 34+ |
