# Supplementary material
Source: Research Square preprint supplement (doi:10.21203/rs.3.rs-8632973/v1)
Supplement: Supplementary file 4 [file a15af0d61711070a681fc370.docx]

**Supplementary File 3. Conceptual Framework**

**Socio- demographic variables**

1. Age
2. Sex
3. Family type
4. Living arrangement
5. Father’s education
6. Mother’s education
7. Economic class of family

**Perceived parental academic pressure**

**Socialization**

1. Number of close friends
2. Time spent with friends

**Corporal punishment at school**

**Bullying**

1. Cyberbullying
2. Physical and emotional bullying.

**Academic variables**

1. Study grade
2. Type of school
3. Study stream
4. Academic stress
5. Result in Last examination

**Social Media, Online communication, and the internet**

**Depression
Anxiety**

**Stress**

**Independent Variables**

**Independent Variables**

**Dependent Variable**
