# Supplementary material
Source: Research Square preprint supplement (doi:10.21203/rs.3.rs-8632973/v1)
Supplement: Supplementary file 5 [file d74c4e5abc817e1233f734f8.docx]

**Supplementary File 2. Operational Definitions**

**Age**

The current age of the respondent in completed years.

**Sex**

Sex of respondents was categorized as Male, Female and others.

**Type of school**

Categorized as government and private.

**Study grade**

Categorized as grade 11 and 12.

**Faculty**

Categorized as Science and Technology, Management, Humanities, and Law.

**Result in last exam**

Refers to the academic outcome in the most recent examination. Categorized as Passed or Failed.

**Ethnicity**

Ethnicity was categorized as Dalit, Janajati, Madhesi, Muslim, Brahmin/Chhetri, and Other, based on the Health Management Information System (HMIS) classification.

**Family Type:**

Families were categorized into three types: nuclear, joint, and extended.

**Father’s education:**

Educational level of the father was categorized as: No Education, Lower Basic (Grades 1–5), Upper Basic (Grades 6–8), Lower Secondary (Grades 9–10), Upper Secondary (Grades 11–12), and More Than Secondary (Above Grade 12), based on the Nepal Demographic and Health Survey (NDHS) 2022 classification [1].

**Mother’s education:**

Educational level of the mother was categorized similarly to the father’s education, based on the NDHS 2022 classification [1].

**Living arrangement:**

Refers to the respondent's current living situation, categorized as: Living with Parents, Living with Relatives, Residing in a Hostel, Living with Friends, Living with Husband/Wife, or Other.

**Socioeconomic status of household:**

Determined by combining monthly family income, occupation of the household head, and education level of the household head. Based on established cut-off scores for Nepal, households were classified as Upper, Middle, or Lower [2].

**Socialization status:**

Socialization was assessed using two questions adapted from Vankim and Nelson [3]. The first question assessed the number of close friends (categorized as Five or More Friends and Fewer Than Five Friends). The second assessed time spent socializing (categorized as Two or More Hours per Day and Less Than Two Hours per Day). Respondents reporting five or more friends **and** at least two hours of socializing per day were categorized as **High Socializing**; all others were categorized as **Low Socializing** [3].

**Corporal punishment at school**

Defined according to the UN Committee on the Rights of the Child as any punishment involving physical force intended to cause some degree of pain or discomfort. Experiences of corporal punishment in school during the past year—such as hitting or slapping by teachers or school staff—were assessed. Categorized as Yes or No [4].

**Bullying on school property.**

Bullying is when one or more student tease, threaten, spread rumours about, hit, shove, or hurt another student repeatedly. It is not bullying when two students of about same strength or power argue or fight or tease each other in a friendly way [5]. Being bullied on school property referred to being bullied inside the premises of the school. It was categorized as Yes if someone had experienced such bullying, and no if they had not.

**Bullying outside school property**

Being bullied outside school property referred to bullying that occurred outside the school premises within the past 12 months. It was categorized as Yes if someone had experienced such bullying, and no if they had not.

**Cyberbullying**

It refers to being bullied through texting, Instagram, Facebook, or other social media in the past 12 months. It has been categorized as Yes if someone experienced such bullying, and no if they did not [5].

**Academic stress**

Assessed using the Scale for Assessing Academic Stress (SAAS), developed by Sinha, Nepal, and Sharma (2001). The SAAS consists of 30 yes/no questions. Each "yes" response scores 1 point, for a total score ranging from 0 to 30. Scores ≤15 were categorized as **No Academic Stress**, while scores >16 were categorized as **Academic Stress**, based on the mean score [6].

**Perceived parental academic pressure**

Assessed using a 20-item tool, with each item rated on a 5-point Likert scale ranging from 1 (Absolutely Inappropriate) to 5 (Absolutely Appropriate). Scores >60 indicated **Presence of Parental Academic Pressure**, while scores ≤60 indicated **No Parental Academic Pressure**, based on the distribution and normality of the data [7].

**Depression, anxiety, and stress**

The Depression, Anxiety, and Stress Scale-21 (DASS-21) was used to assess symptoms of depression, anxiety, and stress. DASS-21 is a set of three self-report scales designed to measure the emotional states of depression, anxiety, and stress. Each item is rated on a four-point scale ranging from 0 to 3, based on experiences over the past week. Each of the three DASS-21 subscales contains seven items.

- The **depression** scale assesses dysphoria, hopelessness, devaluation of life, self-deprecation, lack of interest or involvement, anhedonia, and inertia.
- The **anxiety** scale assesses autonomic arousal, skeletal muscle effects, situational anxiety, and the subjective experience of anxious affect.
- The **stress** scale assesses difficulty relaxing, nervous arousal, being easily upset or agitated, irritability, over-reactivity, and impatience.

Scores for depression, anxiety, and stress are calculated by summing the scores for the relevant items

[8,9]. The cut off scores for depression, anxiety and stress are given below:

**Table 1 : Scoring and grading of DAS scale**

| Category | Depression | Anxiety | Stress |
| --- | --- | --- | --- |
| Normal | 0-9 | 0-7 | 0-14 |
| Mild | 10-13 | 8-9 | 15-18 |
| Moderate | 14-20 | 10-14 | 19-25 |
| Severe | 21-27 | 15-19 | 26-33 |
| Extremely Severe | 28+ | 20+ | 34+ |

**Reference**

1. Ministry of Health and Population, New ERA, ICF. Nepal Demographic Health Survey 2022. 2023 p. 1–10.

2. Sk J. Modification of Kuppuswamy’s Socioeconomic Status Scale in the Context of Nepal, 2019.

3. VanKim NA, Nelson TF. Vigorous Physical Activity, Mental Health, Perceived Stress, and Socializing among College Students. Am J Health Promot. 2013;28:15–7.

4. Gershoff ET. School corporal punishment in global perspective: prevalence, outcomes, and efforts at intervention. Psychol Health Med. 2017 Mar 6;22(sup1):224–39.

5. GSHS core questionnaire modules (2021) [Internet]. [cited 2025 Jan 15]. Available from: https://www.who.int/publications/m/item/gshs-core-questionnaire-modules-(2021)

6. Sinha UK, Sharma V, Nepal MK. Development of a scale for assessing academic stress: a preliminary report. J Inst Med Nepal. 2001 Jun 30;23(1 & 2):105–12.

7. Kaynak S, Sevgili Koçak S, Kaynak Ü. Measuring adolescents’ perceived parental academic pressure: A scale development study. Curr Psychol. 2021 Mar 4;42.

8. Psychometric properties of the Nepali language version of the Depression Anxiety Stress Scales (DASS‐21) - Thapa - 2022 - Nursing Open - Wiley Online Library [Internet]. [cited 2024 Oct 1]. Available from: https://onlinelibrary.wiley.com/doi/full/10.1002/nop2.959?msockid=092d24363e446b963e9837cf3ff66a29

9. Depression Anxiety Stress Scales - DASS [Internet]. [cited 2025 Jan 15]. Available from: https://www2.psy.unsw.edu.au/dass/
